# Supplementary material for: Validation of the 36-item version of the WHO Disability Assessment Schedule 2.0 (WHODAS 2.0) for assessing women's disability and functioning associated with maternal morbidity
Source: PubMed Central journal article supplement — Rev Bras Ginecol Obstet. 2017 Feb 23;39(2):44–52. doi: 10.1055/s-0037-1598599 (PMC10309388; doi:10.1055/s-0037-1598599), 2017-02-23
Supplement: 10-1055-s-0037-1598599_s5893table.pdf [file 10-1055-s-0037-1598599_s5893table.pdf]

Anexo 1. Versão adaptada ao Português da Escala de Avaliação de Incapacidades da Organização Mundial de Saúde (WHODAS 2.0)

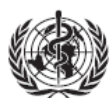

# WHODAS 2.0

WORLD HEALTH ORGANIZATION  
DISABILITY ASSESSMENT SCHEDULE 2.0

36

Interview

Este questionário contém a versão de 36 itens do WHODAS 2.0 aplicado por entrevista

*Instruções para os entrevistadores estão escritas em negrito e itálico – não leia em voz alta.*

*O texto a ser lido em voz alta para o entrevistado está escrito em azul*

*Leia este texto em voz alta*

## Seção 1- Folha de Rosto

| <i>Complete os itens F1-F5 antes de iniciar cada entrevista</i> |                                                                               |                            |       |       |
|-----------------------------------------------------------------|-------------------------------------------------------------------------------|----------------------------|-------|-------|
| F1                                                              | Identidade do entrevistado - número                                           |                            |       |       |
| F2                                                              | Identidade do entrevistador. - número                                         |                            |       |       |
| F3                                                              | Momentos da avaliação (1,2,etc.)                                              |                            |       |       |
| F4                                                              | Data da entrevista                                                            | _____                      | _____ | _____ |
|                                                                 |                                                                               | dia                        | mês   | ano   |
| F5                                                              | Condição em que vive no momento da entrevista (faça um círculo em apenas uma) | Independente na comunidade |       | 1     |
|                                                                 |                                                                               | Vive com assistência       |       | 2     |
|                                                                 |                                                                               | Hospitalizado              |       | 3     |

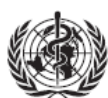

## Seção 2- Informações Gerais e Demográficas

Esta entrevista foi desenvolvida pela Organização Mundial de Saúde para melhor compreender as dificuldades que as pessoas podem ter em decorrência de seu estado de saúde. As informações que você fornecer nesta entrevista são confidenciais e serão utilizadas exclusivamente para pesquisa. A entrevista terá a duração de 15 a 20 minutos.

**Para entrevistados da população em geral (não a população clínica) diga:**

Mesmo que você seja saudável e não tenha deficiências/dificuldades, é necessário que eu faça todas as perguntas do questionário.

Eu vou começar com algumas perguntas gerais.

|                          |                                                                                                     |                                                                                   |   |
|--------------------------|-----------------------------------------------------------------------------------------------------|-----------------------------------------------------------------------------------|---|
| A1                       | <b><i>Anote o sexo da pessoa conforme observado</i></b>                                             | Feminino                                                                          | 1 |
|                          |                                                                                                     | Masculino                                                                         | 2 |
| A2                       | <b>Qual sua idade?</b>                                                                              | _____anos                                                                         |   |
| A3                       | <b>Quantos anos no total você passou estudando em escola, faculdade ou universidade?</b>            | _____anos                                                                         |   |
| A4                       | <b>Qual é o seu estado civil atual?<br/>(Escolha a melhor opção)</b>                                | Nunca se casou                                                                    | 1 |
|                          |                                                                                                     | Atualmente casado                                                                 | 2 |
|                          |                                                                                                     | Separado (a)                                                                      | 3 |
|                          |                                                                                                     | Divorciado (a)                                                                    | 4 |
|                          |                                                                                                     | Viúvo (a)                                                                         | 5 |
|                          |                                                                                                     | Mora junto                                                                        | 6 |
| A5                       | <b>Qual opção descreve melhor sua principal atividade de trabalho?<br/>(Escolha a melhor opção)</b> | Trabalho remunerado                                                               | 1 |
|                          |                                                                                                     | Autônomo (a), por exemplo, é dono do próprio negócio ou trabalha na própria terra | 2 |
|                          |                                                                                                     | Trabalho não remunerado como trabalho voluntário ou caridade                      | 3 |
|                          |                                                                                                     | Estudante                                                                         | 4 |
|                          |                                                                                                     | Dona de casa                                                                      | 5 |
|                          |                                                                                                     | Aposentado (a)                                                                    | 6 |
|                          |                                                                                                     | Desempregado (por problemas de saúde)                                             | 7 |
|                          |                                                                                                     | Desempregado (por outros motivos)                                                 | 8 |
| Outros(especifique)_____ | 9                                                                                                   |                                                                                   |   |

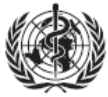

## WHODAS 2.0

WORLD HEALTH ORGANIZATION  
DISABILITY ASSESSMENT SCHEDULE 2.0

36

Interview

### Seção 3 - Introdução

*Diga ao entrevistado (a):*

A entrevista é sobre as dificuldades que as pessoas têm por causa de problemas de saúde.

*Dê o cartão respostas n° 1 para o entrevistado (a) e diga:*

Por problemas de saúde quero dizer doenças ou enfermidades, outros problemas de saúde que podem ser de curta ou longa duração, lesões, problemas mentais ou emocionais e problemas com álcool e/ou drogas.

Lembre-se de todos os seus problemas de saúde, à medida que responder as perguntas. Quando eu perguntar sobre a dificuldade em fazer uma atividade pense em .....

*Aponte para o cartão respostas n° 1 e explique que a “dificuldade em fazer uma atividade” significa:*

Esforço aumentado

Desconforto ou dor

Lentidão

Alterações no modo de você fazer a atividade

*Diga ao entrevistado:*

Quando responder, gostaria que você pensasse nos últimos 30 dias. Eu gostaria ainda que você respondesse essas perguntas pensando quanta dificuldade você teve em média nos últimos 30 dias enquanto fazia as suas atividades rotineiras.

*Entregue o cartão resposta n° 2 ao entrevistado (a) e diga:*

Use esta escala ao responder.

*Leia a escala em voz alta:*

Nenhuma, leve, moderada, grave, extrema ou não pode fazer.

*Certifique-se que o entrevistado possa ver facilmente os cartões resposta 1 e 2 durante toda a entrevista*

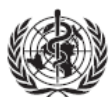

## Seção 4 - Revisão dos domínios

### DOMÍNIO 1 – COGNIÇÃO

Eu vou fazer algumas perguntas sobre [compreensão e comunicação](#).

*Mostre cartões resposta nº 1 e 2 ao entrevistado*

| Nos últimos 30 dias, quanta dificuldade você teve em: |                                                                                                  | Nenhuma | Leve | Moderada | Grave | Extrema ou não consegue fazer |
|-------------------------------------------------------|--------------------------------------------------------------------------------------------------|---------|------|----------|-------|-------------------------------|
| D.1.1                                                 | <a href="#">Concentrar-se para fazer alguma coisa durante dez minutos?</a>                       | 1       | 2    | 3        | 4     | 5                             |
| D.1.2                                                 | <a href="#">Lembrar-se de fazer coisas importantes?</a>                                          | 1       | 2    | 3        | 4     | 5                             |
| D.1.3                                                 | <a href="#">Analisar e encontrar soluções para problemas do dia-a-dia?</a>                       | 1       | 2    | 3        | 4     | 5                             |
| D.1.4                                                 | <a href="#">Aprender uma nova tarefa, por exemplo, aprender como chegar em algum lugar novo?</a> | 1       | 2    | 3        | 4     | 5                             |
| D.1.5                                                 | <a href="#">Entender o que as pessoas falam?</a>                                                 | 1       | 2    | 3        | 4     | 5                             |
| D.1.6                                                 | <a href="#">Começar e manter uma conversa?</a>                                                   | 1       | 2    | 3        | 4     | 5                             |

*Por favor continue na próxima página...*

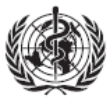

## DOMÍNIO 2 – LOCOMOÇÃO

Agora vou perguntar sobre as dificuldades que você tem em se locomover.

*Mostre cartões resposta nº 1 e 2*

| Nos últimos 30 dias, quanta dificuldade você teve ao: |                                                                                                 | Nenhuma | Leve | Moderada | Grave | Extrema ou não consegue fazer |
|-------------------------------------------------------|-------------------------------------------------------------------------------------------------|---------|------|----------|-------|-------------------------------|
| D.2.1                                                 | <u>Ficar em pé por longos períodos, como 30 minutos?</u>                                        | 1       | 2    | 3        | 4     | 5                             |
| D.2.2                                                 | <u>Levantar-se quando estava sentado (a)?</u>                                                   | 1       | 2    | 3        | 4     | 5                             |
| D.2.3                                                 | <u>Locomover-se dentro da sua casa?</u>                                                         | 1       | 2    | 3        | 4     | 5                             |
| D.2.4                                                 | <u>Sair da sua casa?</u>                                                                        | 1       | 2    | 3        | 4     | 5                             |
| D.2.5                                                 | <u>Andar por longas distâncias uma longa distância, como por 1 quilometro [ou equivalente]?</u> | 1       | 2    | 3        | 4     | 5                             |

*Por favor continue na próxima página...*

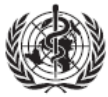**DOMÍNIO 3 – AUTO-CUIDADO**

Agora eu vou perguntar sobre as dificuldades no auto-cuidado (em cuidar de você mesmo (a)).

*Mostre cartões resposta nº 1 e 2*

| Nos últimos 30 dias, quanta dificuldade você sentiu ao: |                                           | Nenhuma | Leve | Moderada | Grave | Extrema ou não consegue fazer |
|---------------------------------------------------------|-------------------------------------------|---------|------|----------|-------|-------------------------------|
| D.3.1                                                   | <u>Lavar seu corpo inteiro?</u>           | 1       | 2    | 3        | 4     | 5                             |
| D.3.2                                                   | <u>Vestir-se?</u>                         | 1       | 2    | 3        | 4     | 5                             |
| D.3.3                                                   | <u>Comer?</u>                             | 1       | 2    | 3        | 4     | 5                             |
| D.3.4                                                   | <u>Ficar sozinho (a) por alguns dias?</u> | 1       | 2    | 3        | 4     | 5                             |

**DOMÍNIO 4- RELACIONAMENTO COM AS PESSOAS**

Agora eu vou lhe perguntar sobre dificuldades em relacionar-se com as pessoas. Por favor, lembre-se que eu vou perguntar apenas sobre as dificuldades em relação a problemas de saúde. Sobre problemas de saúde quero dizer doenças, enfermidades, lesões, problemas mentais ou emocionais e problemas com álcool ou drogas.

*Mostre cartões resposta nº 1 e 2*

| Nos últimos 30 dias, quanta dificuldade você teve em: |                                                           | Nenhuma | Leve | Moderada | Grave | Extrema ou não consegue fazer |
|-------------------------------------------------------|-----------------------------------------------------------|---------|------|----------|-------|-------------------------------|
| D.4.1                                                 | <u>Lidar com pessoas que você não conhece?</u>            | 1       | 2    | 3        | 4     | 5                             |
| D.4.2                                                 | <u>Manter uma amizade?</u>                                | 1       | 2    | 3        | 4     | 5                             |
| D.4.3                                                 | <u>Relacionar-se com pessoas que são próximas a você?</u> | 1       | 2    | 3        | 4     | 5                             |
| D.4.4                                                 | <u>Fazer novas amizades?</u>                              | 1       | 2    | 3        | 4     | 5                             |
| D.4.5                                                 | <u>Ter atividades sexuais?</u>                            | 1       | 2    | 3        | 4     | 5                             |

*Por favor continue na próxima página...*

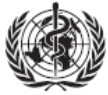

## DOMÍNIO 5 - ATIVIDADES DA VIDA

### 5(1) Atividades Domésticas

As próximas perguntas são sobre a manutenção do seu lar e sobre o cuidado das pessoas com as quais você vive ou que são próximas a você. Estas atividades incluem cozinhar, limpar, fazer compras, cuidar das pessoas e dos seus pertences pessoais.

*Mostre cartões resposta nº 1 e 2*

| Por causa de seu problema de saúde, nos últimos 30 dias, quanta dificuldade você teve ao: |                                                                          | Nenhuma | Leve | Moderada | Grave | Extrema ou não consegue fazer |
|-------------------------------------------------------------------------------------------|--------------------------------------------------------------------------|---------|------|----------|-------|-------------------------------|
| D.5.1                                                                                     | Cuidar das <u>responsabilidades domésticas</u> ?                         | 1       | 2    | 3        | 4     | 5                             |
| D.5.2                                                                                     | Fazer <u>bem</u> as tarefas domésticas mais importantes?                 | 1       | 2    | 3        | 4     | 5                             |
| D.5.3                                                                                     | Fazer todas as tarefas domésticas que você <u>precisava</u> fazer?       | 1       | 2    | 3        | 4     | 5                             |
| D.5.4                                                                                     | Fazer as tarefas domésticas <u>rapidamente</u> , conforme a necessidade? | 1       | 2    | 3        | 4     | 5                             |

*Se qualquer das respostas de D 5.2 a D 5.4 for maior que "nenhuma" (1), pergunte:*

|              |                                                                                                                                    |                        |
|--------------|------------------------------------------------------------------------------------------------------------------------------------|------------------------|
| <b>D5.01</b> | Nos últimos 30 dias, quantos dias você reduziu ou deixou de fazer as <u>atividades domésticas</u> por causa de problemas de saúde? | ANOTE O NÚMERO DE DIAS |
|--------------|------------------------------------------------------------------------------------------------------------------------------------|------------------------|

*Se o entrevistado (a) trabalha, (remunerado, não-remunerado, autônomo) ou vai a escola, complete as questões D5.5 –D5.10 na próxima página. Caso contrário pule para D6.1 na próxima página.*



## 5(2) ATIVIDADES DE TRABALHO OU ESCOLA

Agora farei perguntas sobre o seu trabalho ou escola.

*Mostre cartões resposta nº 1 e 2*

| Por causa de seu problema de saúde, nos últimos 30 dias, quanta dificuldade você sentiu: |                                                                                              | Nenhuma | Leve | Moderada | Grave | Extrema ou não consegue fazer |
|------------------------------------------------------------------------------------------|----------------------------------------------------------------------------------------------|---------|------|----------|-------|-------------------------------|
| D.5.5                                                                                    | No seu <u>trabalho</u> do dia-a-dia?                                                         | 1       | 2    | 3        | 4     | 5                             |
| D.5.6                                                                                    | Ao realizar <u>bem</u> as tarefas mais importantes?                                          | 1       | 2    | 3        | 4     | 5                             |
| D.5.7                                                                                    | Ao fazer <u>todo</u> trabalho que precisava fazer?                                           | 1       | 2    | 3        | 4     | 5                             |
| D.5.8                                                                                    | Em concluir o seu trabalho <u>tão rápido</u> quanto o necessário?                            | 1       | 2    | 3        | 4     | 5                             |
|                                                                                          |                                                                                              |         |      |          |       |                               |
| D.5.9                                                                                    | Você já teve que <u>reduzir a intensidade</u> de trabalho por causa de um problema de saúde? |         |      |          | Não   | 1                             |
|                                                                                          |                                                                                              |         |      |          | Sim   | 2                             |
| D.5.10                                                                                   | Você ganhou <u>menos dinheiro</u> como resultado de um problema de saúde?                    |         |      |          | Não   | 1                             |
|                                                                                          |                                                                                              |         |      |          | Sim   | 2                             |

*Se qualquer das respostas de D 5.5 a D 5.8 for maior que "nenhuma" (1), pergunte:*

|              |                                                                                                                                                                     |                                 |
|--------------|---------------------------------------------------------------------------------------------------------------------------------------------------------------------|---------------------------------|
| <b>D5.02</b> | Nos últimos 30 dias, quantos dias você teve que <u>faltar no trabalho</u> (ou <u>deixou de trabalhar</u> ) por mais de meio dia em função de seu problema de saúde? | ANOTE O NÚMERO DE DIAS<br>_____ |
|--------------|---------------------------------------------------------------------------------------------------------------------------------------------------------------------|---------------------------------|

*Por favor continue na próxima página...*





## DOMÍNIO 6 - PARTICIPAÇÃO

Agora, eu vou perguntar sobre sua participação na sociedade e o impacto que os seus problemas de saúde têm sobre você e em sua família. Algumas destas perguntas podem envolver problemas que ultrapassam os últimos 30 dias. No entanto, por favor, fixe-se nos últimos 30 dias para responder. Novamente, quero lembrar-lhe de responder as perguntas, pensando nos problemas de saúde: físicos, mentais ou emocionais, relacionados ao álcool ou drogas.

*Mostre cartões resposta nº 1 e 2*

| Nos últimos 30 dias: |                                                                                                                                                                                 | Nenhuma | Leve | Moderada | Grave | Extrema ou não consegue fazer |
|----------------------|---------------------------------------------------------------------------------------------------------------------------------------------------------------------------------|---------|------|----------|-------|-------------------------------|
| D.6.1                | Quanto problema você teve ao participar de <u>atividades comunitárias</u> (por exemplo, festividades, atividades religiosas ou outras) do mesmo modo que qualquer outra pessoa? | 1       | 2    | 3        | 4     | 5                             |
| D.6.2                | Quanto problema você teve por causa de <u>barreiras ou obstáculos do mundo à sua volta</u> ?                                                                                    | 1       | 2    | 3        | 4     | 5                             |
| D.6.3                | Quanto problema você teve para <u>viver com dignidade</u> , por causa das atitudes e ações dos outros?                                                                          | 1       | 2    | 3        | 4     | 5                             |
| D.6.4                | Quanto <u>tempo</u> você gastou com seu problema de saúde, ou suas consequências?                                                                                               | 1       | 2    | 3        | 4     | 5                             |
| D.6.5                | Quanto <u>você</u> foi afetado (a) <u>emocionalmente</u> pelo seu problema de saúde?                                                                                            | 1       | 2    | 3        | 4     | 5                             |
| D.6.6                | Quanto a sua saúde tem pesado no seu bolso ou nos <u>recursos financeiros</u> de sua família?                                                                                   | 1       | 2    | 3        | 4     | 5                             |
| D.6.7                | Quanto problema a sua <u>família</u> teve por causa de seu problema de saúde?                                                                                                   | 1       | 2    | 3        | 4     | 5                             |
| D.6.8                | Quanto problema você teve ao fazer as coisas por <u>si mesmo (a)</u> para <u>relaxar ou ter prazer</u> ?                                                                        | 1       | 2    | 3        | 4     | 5                             |

|    |                                                                                                                                                                                                                     |                        |
|----|---------------------------------------------------------------------------------------------------------------------------------------------------------------------------------------------------------------------|------------------------|
| H1 | Em geral, nos últimos 30 dias, quantos dias essas <u>dificuldades estiveram presentes</u> ?                                                                                                                         | ANOTE O NÚMERO DE DIAS |
| H2 | Nos últimos 30 dias, quantos dias você esteve <u>totalmente incapaz</u> de realizar as suas atividades habituais ou de trabalho devido aos seus problemas de saúde?                                                 | ANOTE O NÚMERO DE DIAS |
| H3 | Nos últimos 30 dias, não contando os dias que você esteve <u>totalmente incapaz</u> , por quantos dias você interrompeu ou diminuiu as suas atividades habituais ou de trabalho devido aos seus problemas de saúde? | ANOTE O NÚMERO DE DIAS |

Isto encerra nossa entrevista. Obrigado por sua participação.

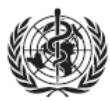

## **WHODAS 2.0**

WORLD HEALTH ORGANIZATION  
DISABILITY ASSESSMENT SCHEDULE 2.0

36

Interview

### *Cartão Resposta 1*

#### **Problemas de saúde:**

- **Doenças, enfermidades ou outros problemas de saúde**
- **Lesões**
- **Problemas mentais ou emocionais**
- **Problemas com álcool**
- **Problemas com drogas**

#### **Tendo dificuldade com atividades significa:**

- **Esforço aumentado**
- **Desconforto ou dor**
- **Lentidão**
- **Alterações no modo de você fazer a atividade**

**Pense somente nos últimos 30 dias**

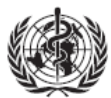

# WHODAS 2.0

WORLD HEALTH ORGANIZATION  
DISABILITY ASSESSMENT SCHEDULE 2.0

36

Interview

## Cartão Resposta 2

---

**1**  
**Nenhuma**

**2**  
**Leve**

**3**  
**Moderada**

**4**  
**Grave**

**5**  
**Extrema ou**  
**Não consegue fazer**
